# Supplementary material for: C3N4-digested 3D construction of hierarchical metallic phase MoS2 nanostructures
Source: Royal Society of Chemistry journal article supplement (doi:10.1039/c9ta06115k), 2019-01-01
Supplement: c9ta06115k1.pdf [file c9ta06115k1.pdf]

## Supporting information

# **C<sub>3</sub>N<sub>4</sub>-digested 3D construction of hierarchical metallic phase MoS<sub>2</sub> nanostructures**

Jiayu Wang<sup>1</sup>, Jing Tang<sup>2\*</sup>, Tong Guo<sup>1</sup>, Shuaihua Zhang<sup>3,4</sup>, Wei Xia<sup>3</sup>, Haibo Tan<sup>3</sup>, Yoshio Bando<sup>3</sup>, Xin Wang<sup>1\*</sup> and Yusuke Yamauchi<sup>5\*</sup>

1. Key Laboratory for Soft Chemistry and Functional Materials of Ministry Education, Nanjing University of Science and Technology, 210094 Nanjing, China.
2. School of Chemistry and Molecular Engineering, Shanghai Key Laboratory of Green Chemistry and Chemical Processes, East China Normal University, Shanghai, 200062, China.
3. International Center for Materials Nanoarchitectonics (MANA), National Institute for Materials Science (NIMS), 1-1 Namiki, Tsukuba, Ibaraki 305-0044, Japan.
4. Department of Chemistry, College of Science, Hebei Agricultural University, Baoding 071001, Hebei, PR China.
5. School of Chemical Engineering & Australian Institute for Bioengineering and Nanotechnology (AIBN), The University of Queensland, Brisbane, QLD 4072, Australia.

Corresponding authors' email: [TANG.Jing@nims.go.jp](mailto:TANG.Jing@nims.go.jp); [wangx@njust.edu.cn](mailto:wangx@njust.edu.cn); [y.yamauchi@uq.edu.au](mailto:y.yamauchi@uq.edu.au)

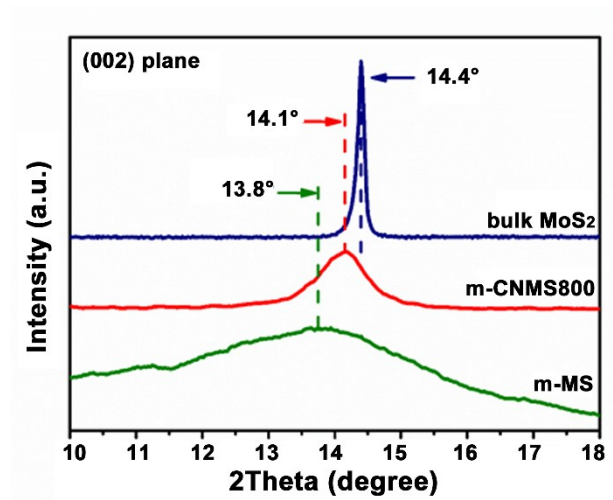

Figure S1. The selected range of XRD pattern of m-MS, m-CNMS-800 and bulk MoS<sub>2</sub>.

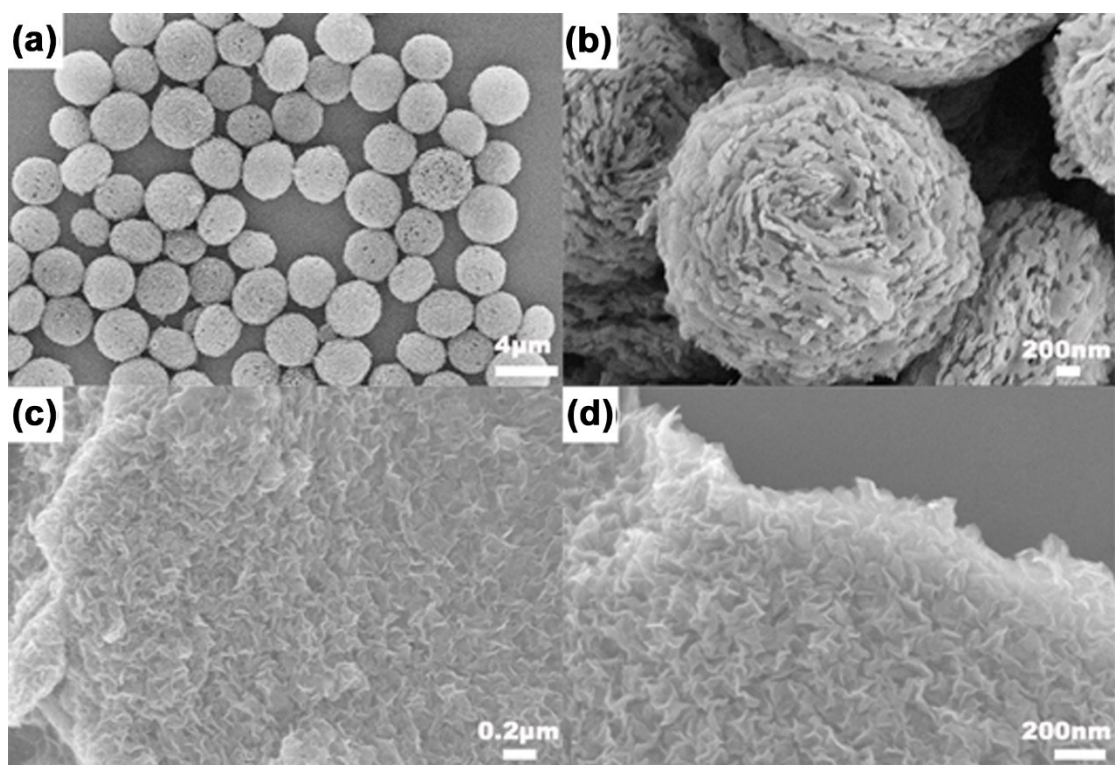

Figure S2. SEM images of (a, b) C<sub>3</sub>N<sub>4</sub> template and (c, d) m-MS.

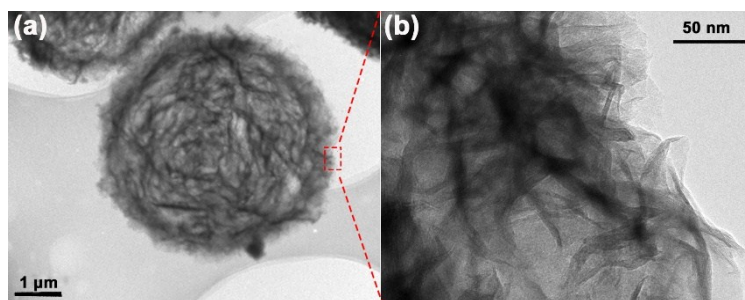

Figure S3. The TEM images of m-CNMS at a low magnification.

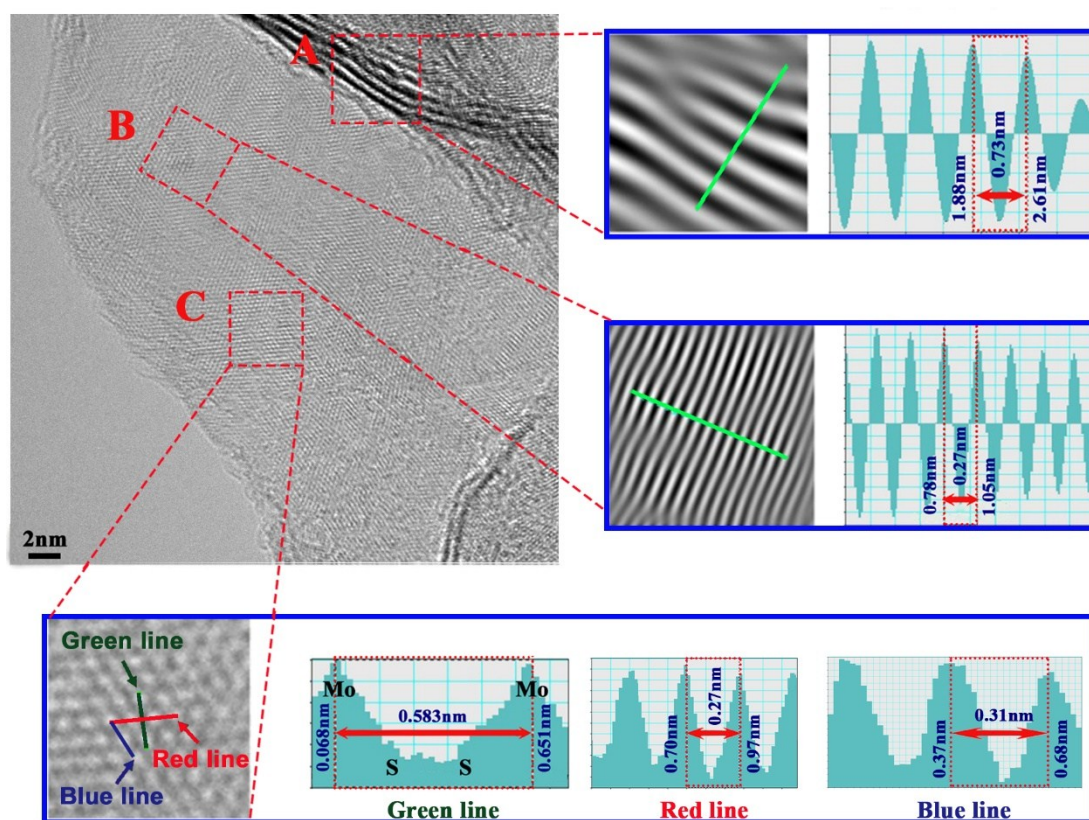

Figure S4. High-resolution TEM images of m-CNMS and the corresponding lattice distance in selected regions.

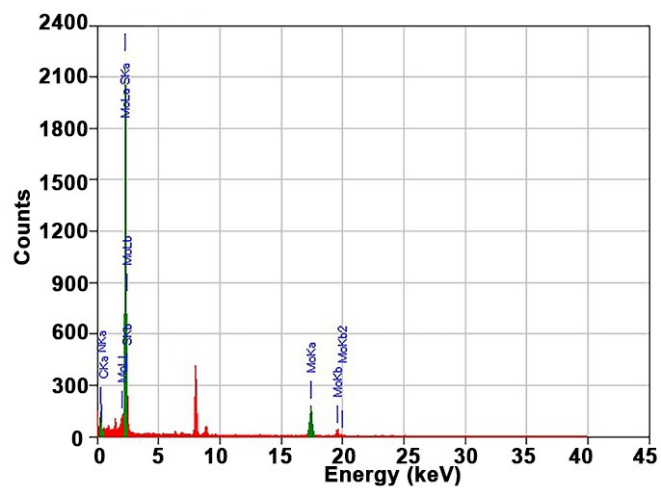

Figure S5. The EDX spectrum of m-CNMS corresponding to the EDX mapping.

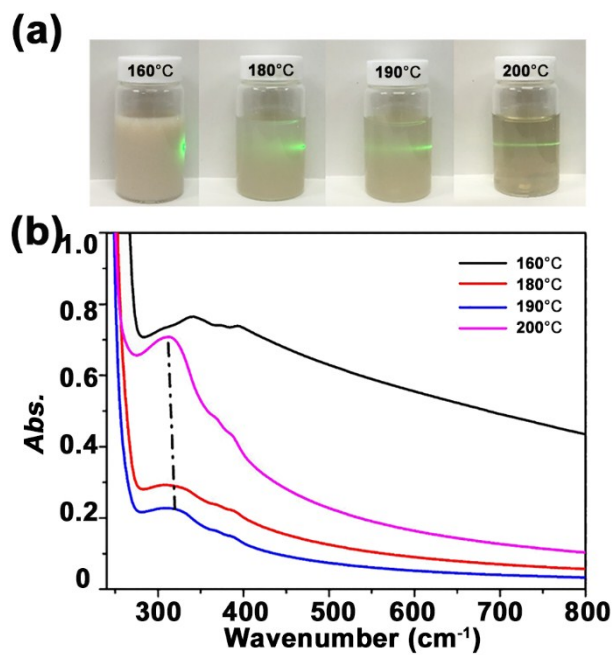

Figure S6. (a) Digital Photos of  $C_3N_4$  after 160, 180, 190 and 200 °C hydrothermal reaction; (b) UV-Visible absorption spectra of  $C_3N_4$  solution after different hydrothermal reaction.

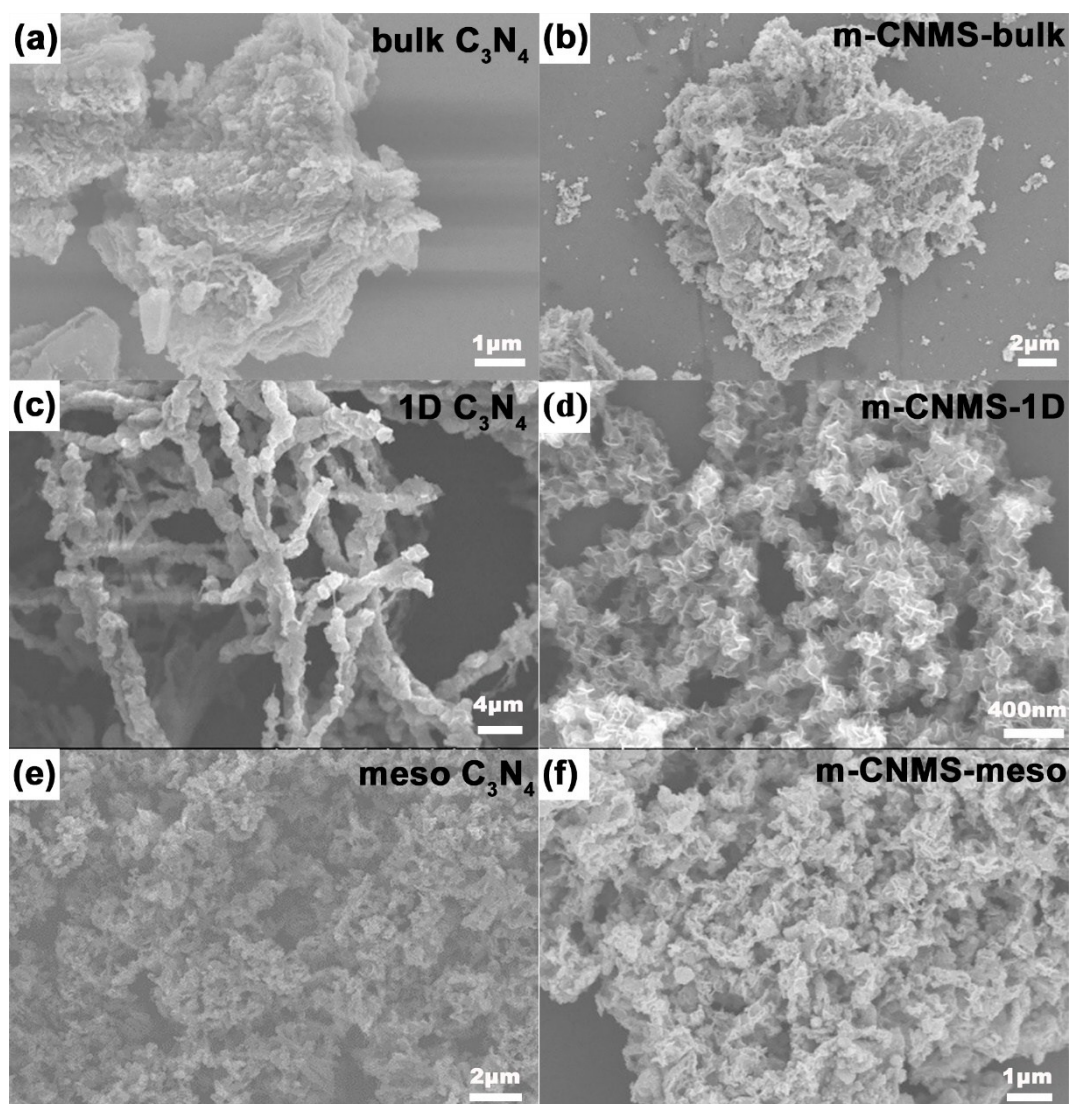

Figure S7. SEM images of  $C_3N_4$  templates with different morphologies and the corresponding prepared  $MoS_2$  product. Note: bulk  $C_3N_4$  was synthesized by calcining melamine at 550 °C in air; 1D  $C_3N_4$  was synthesized by calcining nitric acid treated melamine at 550 °C in air; meso  $C_3N_4$  was synthesized by calcining melamine-cyanuric acid hybrid at 550 °C in air.

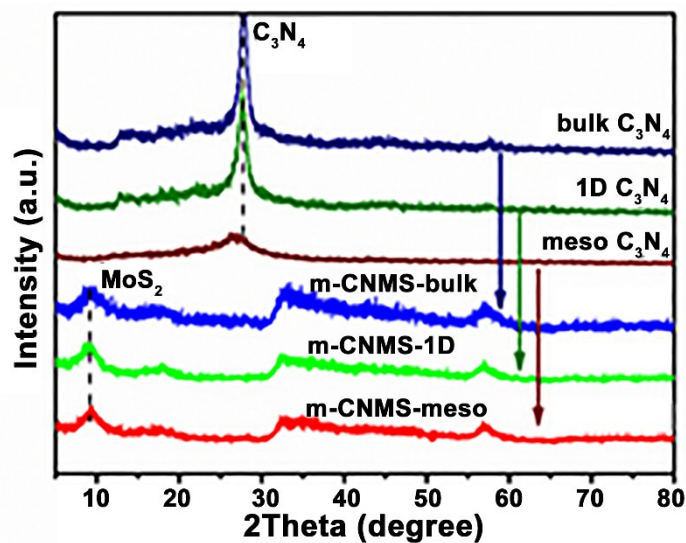

Figure S8. XRD patterns of C<sub>3</sub>N<sub>4</sub> templates with different morphologies and the corresponding prepared MoS<sub>2</sub> product.

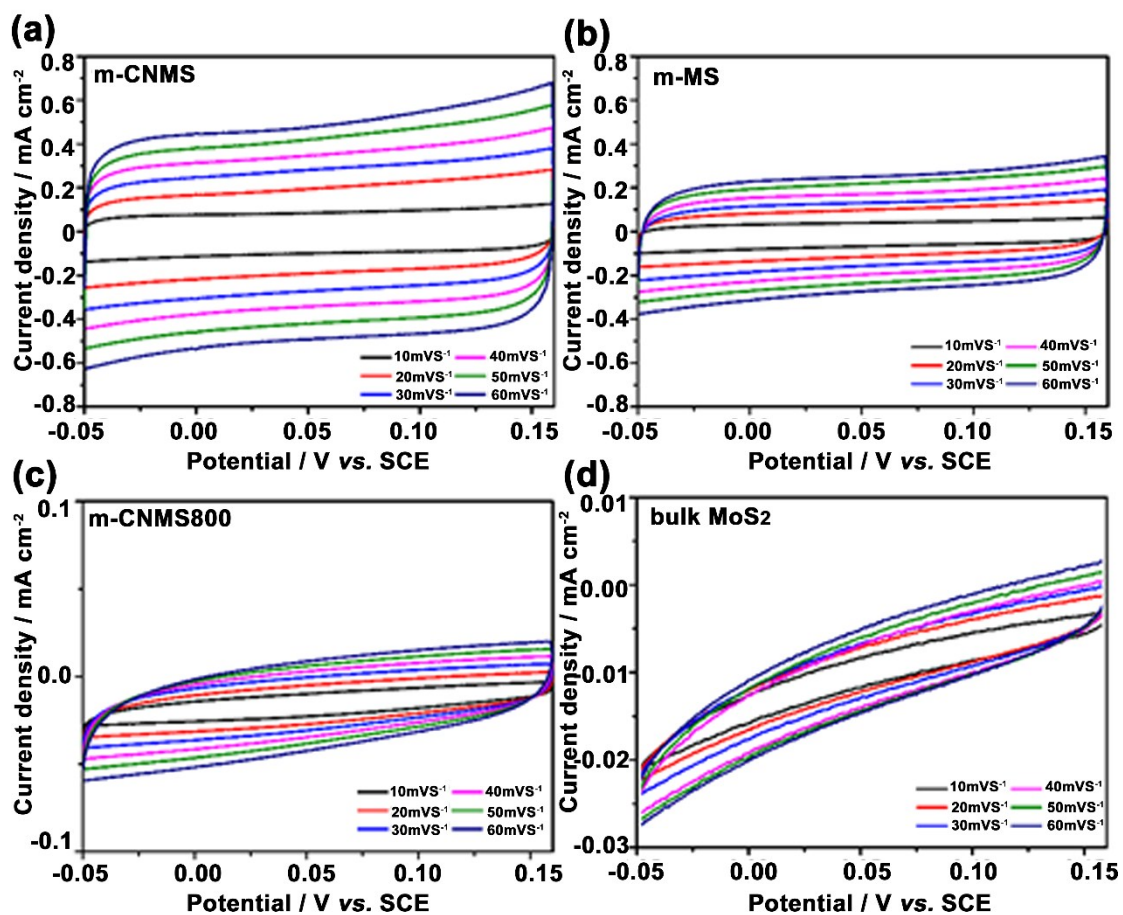

Figure S9. CV curves for m-CNMS (a), m-MS (b), m-CNMS-800 (c) and bulk MoS<sub>2</sub> (d). The

capacitive current of all samples was collected at 0.05 V. Note: ECSA= Cdl / Cs. Cdl is calculated by CV at various scan rates in the non-Faradaic region, and Cdl is equal to the slope of the function of double layer charging current with scan rate. Cs is a specific electrochemical double layer capacitance of an atomically smooth surface, and the value of Cs = 40  $\mu\text{F}/\text{cm}^2$  in this study.

Table S1. Element content of m-CNMS from XPS and EDX.

| Element | Mo         | S          | C          | N         | S/Mo | C/N  |
|---------|------------|------------|------------|-----------|------|------|
| EDX     | 18.5 at. % | 42.6 at. % | 37.4 at. % | 1.5 at. % | 2.3  | 24.9 |
| XPS     | 19.2 at. % | 36.9 at. % | 41.6 at. % | 2.3 at. % | 1.9  | 18.0 |

Table S2. Comparison of HER performance of m-CNMS with other MoS<sub>2</sub>-based electrocatalysts.

| Catalysts                                        | morphology                                         | Current Density | Overpotential at corresponding j<br>mA cm <sup>-2</sup> (mV) | Tafel slope<br>(mVdec <sup>-1</sup> ) | ECSA<br>(cm <sup>2</sup> <sub>ECSA</sub> ) | Ref       |
|--------------------------------------------------|----------------------------------------------------|-----------------|--------------------------------------------------------------|---------------------------------------|--------------------------------------------|-----------|
| 1T MoS <sub>2</sub>                              | Flower-like sphere                                 | 10<br>80        | 215<br>260                                                   | 50.2                                  | 165                                        | This work |
| 1T-2H MoS <sub>2</sub>                           | nanosheet                                          | 20              | 320                                                          | 65                                    | 60.3                                       | 1.        |
| 2H MoS <sub>2</sub>                              | Thin film with vertically aligned MoS <sub>2</sub> | 10              | 210                                                          | 44                                    | /                                          | 2.        |
| 1T' MoS <sub>2</sub>                             | Nanofilm                                           | 10              | 175                                                          | 100                                   | /                                          | 3.        |
| 1T MoS <sub>2</sub>                              | Nanosheet                                          | 10              | 187                                                          | 43                                    | 0.55                                       | 4.        |
| 1T MoS <sub>2</sub>                              | Mesoporous Nanosheet                               | 10              | 153                                                          | 43                                    | 1577                                       | 5.        |
| 1T MoS <sub>2</sub>                              | Nanosheet                                          | 10              | 180                                                          | 41                                    | /                                          | 6.        |
| 2H MoS <sub>2</sub>                              | Nanofilm                                           | 250             | 400                                                          | 50                                    | /                                          | 7.        |
| 2H MoS <sub>2</sub>                              | Mesoporous foam                                    | 10              | 210                                                          | 74                                    | /                                          | 8.        |
| Co <sub>3</sub> S <sub>4</sub> @MoS <sub>2</sub> | Hollow ZIF-like structure                          | 10              | 210                                                          | 88                                    | 202.5                                      | 9.        |
| 2H-1T MoS <sub>2</sub>                           | vertically aligned flakelet on nanosheet           | 10              | 203                                                          | 60                                    | /                                          | 10.       |



## Reference

1. Wang S.; Zhang D.; Li B., Ultrastable In-Plane 1T-2H MoS<sub>2</sub> Heterostructures for Enhanced Hydrogen Evolution Reaction. *Adv. Energy Mater.* 2018, 8(25), 1801345.
2. Wang H.; Lu Z.; Xu S., Electrochemical Tuning of Vertically Aligned MoS<sub>2</sub> Nanofilms and its Application in Improving Hydrogen Evolution Reaction. *Proc. Natl. Acad. Sci.* 2013, 110(49), 19701-19706.
3. Yu Y.; Nam G. H.; He Q., High Phase-Purity 1T'-MoS<sub>2</sub>-and 1T'-MoSe<sub>2</sub>-Layered Crystals. *Nature chem.* 2018, 10(6), 638.
4. Lukowski M. A.; Daniel, A. S.; Meng, F.; Forticaux A.; Li L.; Jin S, Enhanced Hydrogen Evolution Catalysis from Chemically Exfoliated Metallic MoS<sub>2</sub> Nanosheets. *J. Am. Chem. Soc.* 2013, 135(28), 10274-10277.
5. Yin Y.; Han J.; Zhang Y, Contributions of Phase, Sulfur Vacancies, and Edges to the Hydrogen Evolution Reaction Catalytic Activity of Porous Molybdenum Disulfide Nanosheets, *J. Am. Chem. Soc.* 2016, 138(25), 7965-7972.
6. Geng X.; Sun W.; Wu W., Pure and Stable Metallic Phase Molybdenum Disulfide Nanosheets for Hydrogen Evolution Reaction, *Nature commun.* 2016, 7, 10672.
7. Voiry D.; Fullon R.; Yang J., The Role of Electronic Coupling between Substrate and 2D MoS<sub>2</sub> Nanosheets in Electrocatalytic Production of Hydrogen, *Nature Mater.* 2016, 15(9), 1003.
8. Deng J.; Li H.; Wang S., Multiscale Structural and Electronic Control of Molybdenum Disulfide Foam for Highly Efficient Hydrogen Production, *Nature commun.* 2017, 8, 14430.
9. Guo Y.; Tang J.; Qian H.; Wang Z.; Yamauchi Y, One-Pot Synthesis of Zeolitic Imidazolate Framework 67-Derived Hollow Co<sub>3</sub>S<sub>4</sub>@MoS<sub>2</sub> Heterostructures as Efficient Bifunctional Catalysts, *Chem. Mater.* 2017, 29(13), 5566-5573.
10. Yang J.; Wang K.; Zhu J.; Zhang C.; Liu T, Self-Templated Growth of Vertically Aligned 2H-1T MoS<sub>2</sub> for Efficient Electrocatalytic Hydrogen Evolution. *ACS Appl. Mater. Inter.* 2016, 8(46), 31702-31708.
